# Supplementary material for: An aging and p53 related marker: HOXA5 promoter methylation negatively correlates with mRNA and protein expression in old age
Source: publisher site journal article supplement (doi:10.18632/aging.202621), 2021-02-05
Supplement: Supplementary file [file aging-v13i4-202621-supplementary-material-SD2.pdf]

## SUPPLEMENTARY TABLE

Supplementary Table 2. Region-specific primers applied for single CpG analysis.

| Gene  | Number of CpGs | Forward primer                | Reverse primer               |
|-------|----------------|-------------------------------|------------------------------|
| HOXA5 | 14             | 5`-AGCTTCCTTCCTGTTCTGGG-3`    | 5`TCAGAGACACTAGCACAGGAGCC-3` |
| DUSP3 | 4              | 5`-TCCATCACCATGGGTGGAAGGCA-3` | 5`-CTGTCAGTCAAAGAAAGGGA-3`   |
| RYR1  | 25             | 5`-TCCCTGTAGGAGCCTGGACA-3`    | 5`-GGAACCCCAGCCAGTGAGAA-3`   |
